# Supplementary material for: Influence of electronic structure on visible light photocatalytic activity of nitrogen-doped TiO2
Source: Royal Society of Chemistry journal article supplement (doi:10.1039/c6ra25238a), 2017-01-01
Supplement: c6ra25238a1.pdf [file c6ra25238a1.pdf]

ESI

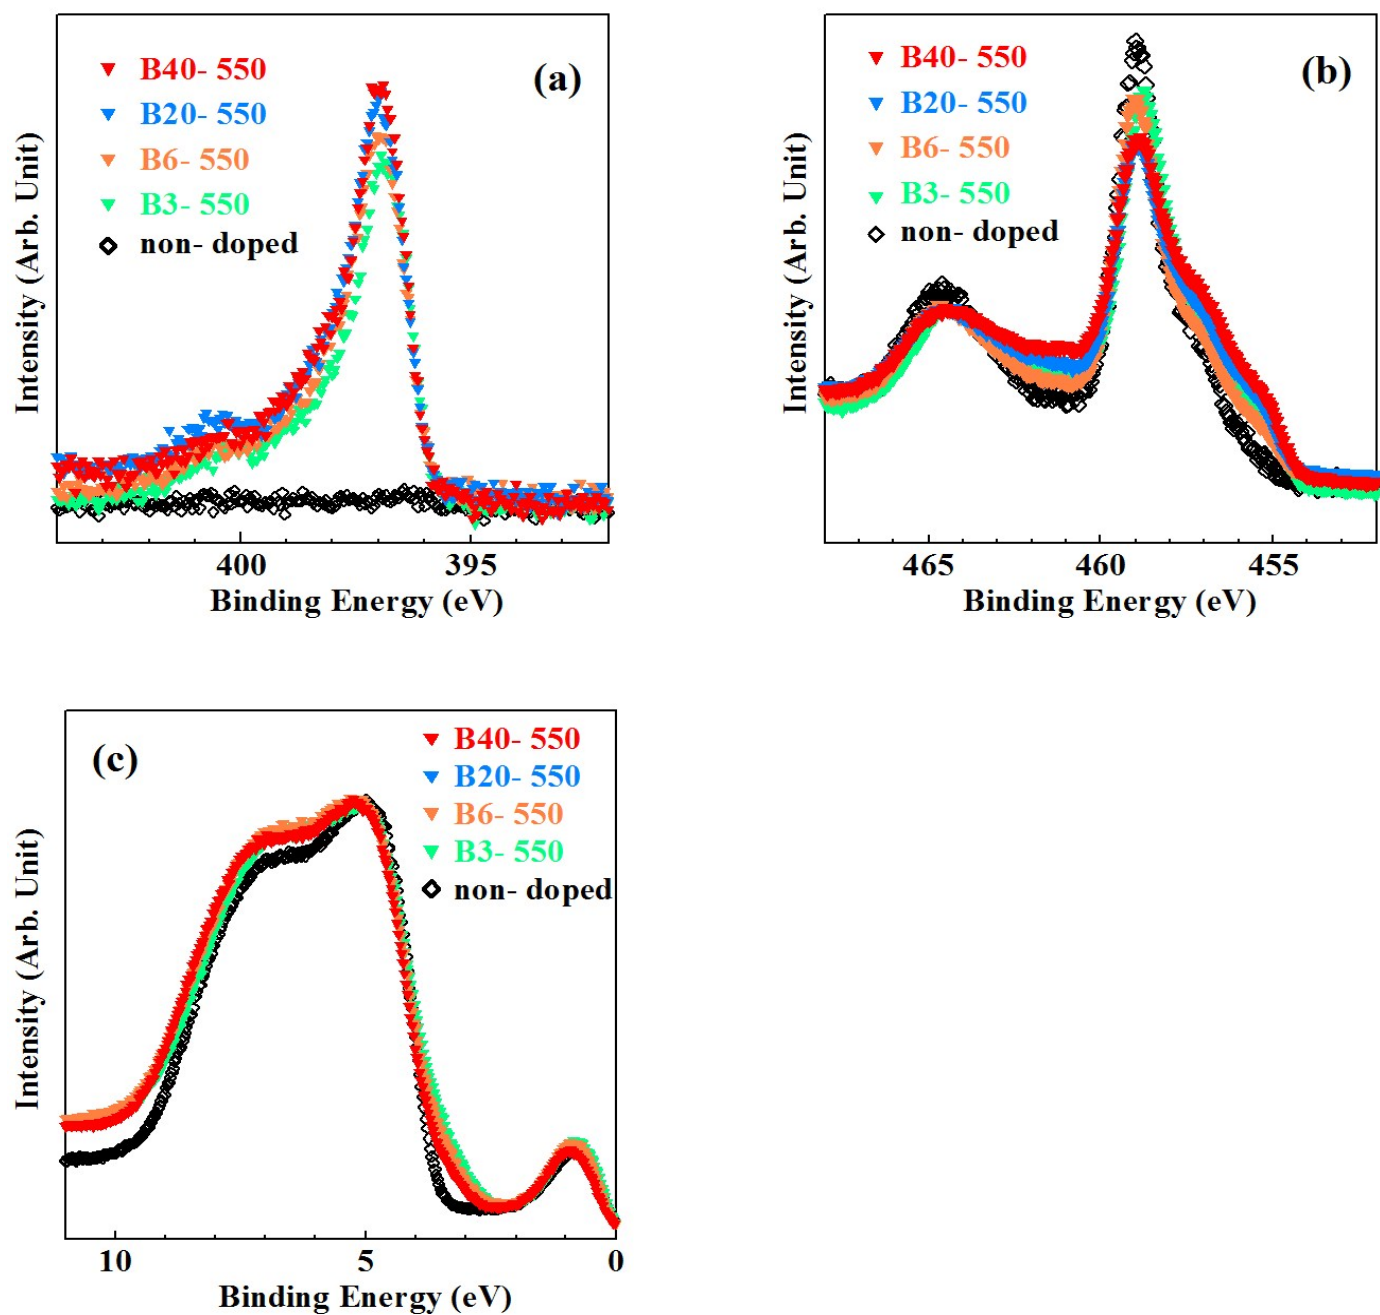

Fig. S1 XPS spectra for the samples synthesized by method B at 550°C. (a) N1s spectra, (b) Ti2p spectra and (c) VB spectra.

|                                     | Fang <i>et al.</i> <sup>55</sup> | Diwald <i>et al.</i> <sup>11</sup> | Asahi <i>et al.</i> <sup>5</sup> | Present study |
|-------------------------------------|----------------------------------|------------------------------------|----------------------------------|---------------|
| Degradation rate (h <sup>-1</sup> ) | 0.44                             | -                                  | -                                | 0.53          |
| Quantum yield (%)                   | -                                | 2.5                                | 4.2                              | 6.1           |
| Optimum N density (at %)            | 0.08                             | -                                  | 1.1                              | 4             |
| Nitridation temperature (°C)        | 500                              | 600                                | 600                              | 550           |

Table S1 The comparison of vis light photocatalytic activities among various studies using NH<sub>3</sub> gas for nitridation.
